# Supplementary material for: Hydrothermal synthesis of novel In2O3 microspheres for gas sensors
Source: Royal Society of Chemistry journal article supplement (doi:10.1039/b904408f), 2009-01-01
Supplement: b904408f.pdf [file b904408f.pdf]

## **Electronic Supplementary Information**

### **Hydrothermal Synthesis of Novel In<sub>2</sub>O<sub>3</sub> Hollow Microspheres for Gas Sensors**

Hao Jiang,<sup>a</sup> Junqing Hu,<sup>\*,b</sup> Feng Gu,<sup>a</sup> Wei Shao<sup>a</sup> and Chunzhong Li<sup>\*,a</sup>

<sup>†</sup> *Key Laboratory for Ultrafine Materials of Ministry of Education, School of Materials Science and Engineering, East China University of Science & Technology, Shanghai, 200237, People's Republic of China*

<sup>‡</sup> *State Key Laboratory for Modification of Chemical Fibers and Polymer Materials, College of Materials Science and Engineering, Donghua University, Shanghai, 200051, People's Republic of China*

#### **Gas sensors properties experiments:**

For the fabrication of gas sensors, the In<sub>2</sub>O<sub>3</sub> powders were mixed and ground with adhesive in an agate mortar to form paste. The paste uniformly coated an alumina tube on which a pair of Au electrodes was previously printed, and dried at 100 °C for 2 h in air, and then sintered at 600 °C for 1 h in air. At last, a Ni-Cr heating wire was inserted. The gas sensors were aged at 300 °C for 240 h in air in order to improve their stability. A stationary state gas distribution was used for the test of gas sensing properties. The chamber was firstly purged by air until a steady baseline of the sensor resistance was reached. Then the test vapor ethanol was injected using a syringe. The gas sensitivity of the sensor in this paper is defined as  $S = R_a/R_g$ ;  $R_a$ , resistance in air,  $R_g$ , resistance in test gas. The response time is expected as the time required for sample variation

conductance to reach 90% of the equilibrium value following an injection of the test gas, and the recovery time is the time necessary for the sample to return to 10% above original conductance in air after releasing the test gas.

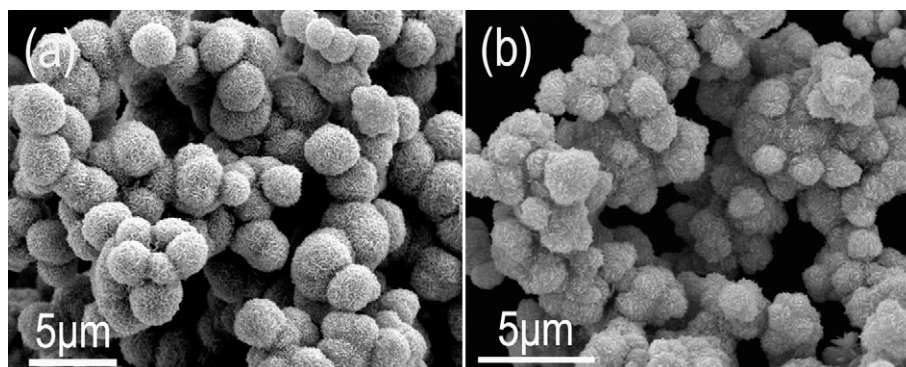

**Fig. S1** SEM images of  $\text{In}_2\text{O}_3$  products prepared at different DMF concentrations at  $180\text{ }^\circ\text{C}$  for 24 h, (c) DMF = 1.5 ml and (d) DMF = 3.0 ml.

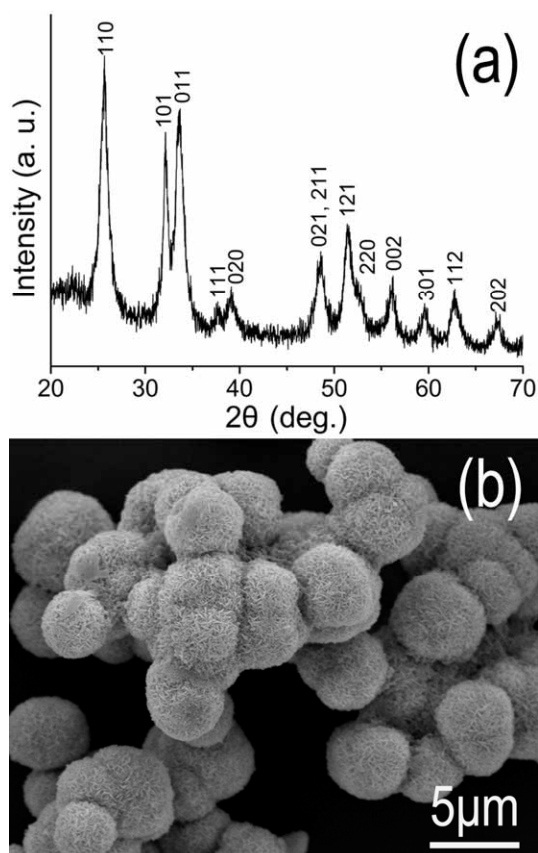

**Figure S2.** The XRD pattern (a) and SEM image (b) of the products before

calcinations, all of the peaks can be indexed to orthorhombic InOOH

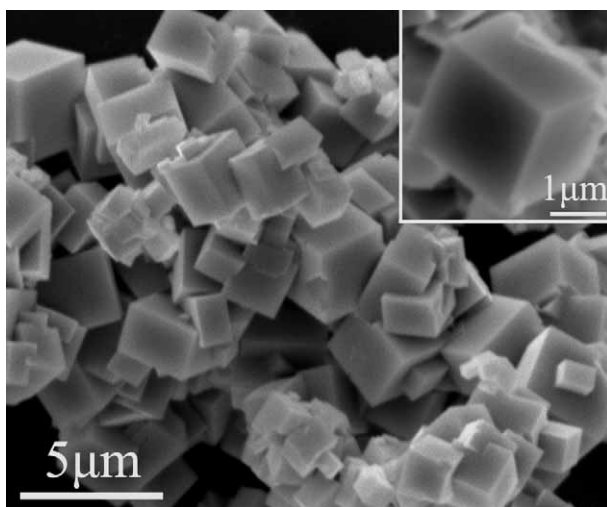

**Figure S3.** SEM images of In<sub>2</sub>O<sub>3</sub> products prepared in the absence of glucose (inset showing a typical well-shaped In<sub>2</sub>O<sub>3</sub> cube)
